## **Protein reservoirs of seeds are composites of amyloid and amyloid-like structures facilitating sustained release during germination and seedling growth**

**Author names and affiliations:** Nabodita Sinha<sup>a</sup>, Talat Zahra<sup>a</sup>, Avinash Yashwant Gahane<sup>a</sup>, Bandita Rout<sup>a</sup>, Arnav Bhattacharya<sup>b</sup>, Sangramjit Basu<sup>b</sup>, Arunabha Chakrabarti<sup>b,c</sup>, Ashwani Kumar Thakur<sup>a\*</sup>

<sup>a</sup>Department of Biological Sciences and Bioengineering, Indian Institute of Technology Kanpur, UP-208016, India.

<sup>b</sup>Tata Translational Cancer Research Centre, Kolkata, India.

<sup>c</sup>SciGenome Labs Pvt. Ltd., Kerala, India (current affiliation)

**\*Corresponding author:** Prof. A.K.Thakur (akthakur@iitk.ac.in); Phone: 91-0512-259-4077

**Total word count for main text:**

**Introduction word count: 552**

**Materials and methods word count: 1113**

**Results word count: 993+1436+936+457+766**

**Discussion word count: 615**

**Total: 6868**

**Number of figures in the main manuscript: 5 (all colour images)**

**Supplemental material:**

**Supplementary Section 1:**

- **Cellulase treatment and Congo red/ThT staining,**
- **Isolation of protein fractions and physicochemical characterization of SSPB,**
- **Amyloidogenic properties of SSPB and the isolated proteins,**
- **Isolation of endoprotease from the germinated seeds and sustained release**

- **Treatment of the seeds and protoplasts with exogenous molecules and their inhibitors,**
- **Processing of LMD samples and protein fractions for MS/MS**

**1. Movie S1 Congo red birefringence in aleurone cells of barley**

**2. Movie S2 Congo red birefringence in cotyledon cells of chickpea**

**3. Fig. S1 Low magnification images of ThT-stained seeds and control images for amyloid-specific staining**

**4. Fig. S2 Demarcation of glucan-rich regions and amyloidogenic content analysis of major storage proteins of seeds**

**5. Fig. S3 Physicochemical characterization of the SSPB and the reconstituted fraction**

**6. Fig. S4 The amyloidogenic properties of the isolated protein fractions**

**7. Table. S1 MS/MS analysis and top-scoring proteins in the SSPB protein fractions**

**8. Fig. S5 ThT and CR fluorescence of germinated seeds to detect amyloids vs amyloid-like aggregates, biophysical characterization of SSPB from germinated seeds and sustained release**

**9. Fig. S6 Quantitation of the proteinaceous signal in the germinated seed sections**

**10. Fig. S7 The presence of amyloid-like, amyloids and protein content at different time-points of germination.**

**11. Fig. S8 Seed endopeptidase characterization and *in-vitro* biological activity**

**12. Fig. S9 Congo red staining of protoplasts treated with exogenous molecules and protoplast control for isolation and staining**

**13. Table S2: List of the number of peptide sequences identified for each protein identified for mungbean and wheat**

1 **Summary:**

2 • **Rationale**

3

4 The function of plant seed storage protein bodies (SSPB) in germination is known for  
5 decades. SSPB have aggregated and electron-rich morphology. However their structural  
6 complexity remains elusive. Based on their morphological similarity to amyloid-  
7 containing protein-bodies of other organisms, and amyloid formation by some plant  
8 proteins under non-native conditions, we hypothesized that SSPB might contain *in-vivo*  
9 amyloid structures for modulating seed functions.

10

11 • **Methods**

12

13 To unambiguously identify seed amyloids in the presence of complex carbohydrate-  
14 structures of plant tissues, multi-spectral methods were used including amyloid-staining  
15 probes, high-resolution-transmission-electron-microscopy, x-ray diffraction and infra-  
16 red-spectroscopy. SSPB amyloid's role in germination was shown using amyloid probes,  
17 MS/MS analysis, and plant hormones/proteases *in-situ* seed-sections and *ex-vivo*  
18 protoplasts.

19

20 • **Key results**

21

22 The SSPB exhibit a composite structure of amyloid, amyloid-like aggregates and soluble  
23 proteins. During germination phases, the amyloids degrade slowly compared to the  
24 amyloid-like structures. Inhibition of amyloid degradation results in lower germination-  
25 index, confirming amyloid's role in germination and seedling-growth.

26

27 • **Conclusion**

28

29 The study for the first time illustrates the presence of composite amyloid structures *in-*  
30 *vivo* in plant seeds and determines their function in seed germination and seedling-  
31 growth. It would open original research questions for decrypting composite amyloid  
32 structure formation during SSPB biogenesis and their evolutionary advancement across  
33 plant species.

34

35 **Keywords: Amyloid composites in plants, Amyloid in germination and seedling growth,**  
36 **Functional amyloids, Protein aggregates, Seed storage protein bodies**

## 37 **Abstract**

38 The seed protein functions and their localization in seed storage protein bodies (SSPB) are  
39 known for several decades. However, the structural and functional complexity of these SSPB is  
40 not known. Interestingly, the plant SSPB is morphologically similar to the amyloid-containing  
41 protein bodies found in other organisms and individual SSPB proteins were previously shown to  
42 form fibrillar structures under non-native conditions *in-vitro*. Therefore, we hypothesized that the  
43 seed storage protein bodies (SSPB) may have similar structures *in-vivo* for controlling seed  
44 functions. Since comprehensive *in-vivo* characterization of the SSPB and the structure-function  
45 relationship remains unexplored, we show firstly that wheat, barley, chickpea, and mungbean  
46 SSPB exhibit a speckled-pattern of amyloids interspersed in an amyloid-like matrix *in-situ*,  
47 suggesting their composite nature. This is confirmed by multiple amyloid-specific probes,  
48 biophysical characterization, electron-microscopy, peptide-fingerprinting, and differential  
49 degradation during germination. Moreover, the role of amyloid composites in seed germination  
50 is proved by the effect of signalling molecules and their correlation to germination parameters,  
51 using *in-situ* seed sections, *ex-vivo* protoplasts and *in-vitro* SSPB. These results would lay down  
52 foundation for understanding the amyloid composite structure during SSPB biogenesis and their  
53 structure-function evolution. It would further facilitate the exploration of molecular and atomic-  
54 level structural details of SSPB amyloids.

55

## 56 **Introduction:**

57 The original study of seed storage proteins in monocots and dicots can be traced back to the 18<sup>th</sup>  
58 century.(Shewry *et al.*, 1995; Shewry & Halford, 2002) The seed storage protein bodies (SSPB)  
59 of aleurone cells in cereals (monocots) are comprised of storage proteins including  
60 globulins,(Kozioł *et al.*, 2012) minerals and lipids.(Reyes *et al.*, 2011; Isaienkov, 2014) In pulses  
61 (dicot), the cotyledon cells contain SSPB with globulins as the major storage  
62 proteins.(Derbyshire *et al.*, 1976; Craig & Millerd, 1981) Most of these proteins are targeted to  
63 the SSPB in association with the Golgi apparatus, forming aggregated electron-rich  
64 structures.(Shewry & Halford, 2002) Similar structures are found in diverse species, ranging  
65 from bacteria to humans.(Schmidt, 2013) Interestingly, some of them also act as storage

66 reservoirs for accumulating enzymes or proteasome units. (Narayanaswamy *et al.*, 2009; Peters  
67 *et al.*, 2015) These aggregates or inclusions are categorized as amyloids or amyloid-like  
68 structures to perform functions of storage and stability. Whereas amyloids are proteinaceous  $\beta$ -  
69 sheet-rich aggregates and exhibit apple-green birefringence with Congo red (CR), amyloid-like  
70 aggregates might lack one or more of the key characteristics of amyloids.(Benson *et al.*, 2020;  
71 Mativ *et al.*, 2020) Although functional amyloids are well-studied in other organisms, there is  
72 prevailing confusion regarding plant amyloids. On one hand, groups have hypothesized that  
73 plants might not have amyloids owing to presence of anti-phenolic compounds in some plant  
74 tissues. (Surguchov *et al.*, 2019) On the other hand, there are *in-silico* and *in-vitro* studies  
75 (Antonets & Nizhnikov, 2017; Antonets *et al.*, 2020) regarding amyloid formation by individual  
76 plant proteins. But there is still lack of a detailed characterization according to current definition  
77 of *in-situ* amyloid detection.(Benson *et al.*, 2020; Mativ *et al.*, 2020) Additionally, the role of  
78 the key molecular players in amyloid function is lacking. Since hormones and proteases play a  
79 major role in the maintenance/degradation of SSPB and subsequent germination, the effect of  
80 these molecular players on the amyloid aggregates need to be understood.(Guo & Ho, 2008) For  
81 this purpose, seed protoplasts are an ideal choice since the absence of cell walls reduces amyloid  
82 staining misperceptions. Also, protoplasts represent a dynamic active metabolic state and can be  
83 utilized to capture the effect of the exogenous effector molecules.

84 Although the protein content and types of the SSPB are known, their structural and functional  
85 complexity remains to be deciphered. Considering the structure-function relationship of protein  
86 bodies found in other organisms, we hypothesized that SSPB might possess amyloid or amyloid-  
87 like aggregates for performing seed physiological functions. In this study, we have used a  
88 combinatorial approach of multiple amyloid-specific probes and shown that the seed sections and  
89 protoplasts of wheat (*Triticum aestivum*) and barley (*Hordeum vulgare*), (monocotyledonous  
90 seeds with an endosperm as the major storage tissue) and chickpea (*Cicer arietinum*) and  
91 mungbean (*Vigna radiata*) (dicotyledonous seeds with two cotyledons as major storage tissue)  
92 exhibit a composite of amyloid and amyloid-like signatures in the SSPB of the aleurone and  
93 cotyledon cells. The amyloid-specific characteristics in the isolated SSPB and fibrillar nature of  
94 the amyloids shown by transmission electron microscopy (TEM)/ high-resolution TEM  
95 (HRTEM), and x-ray diffraction, further bolsters the hypothesis. The amyloidogenic proteins are  
96 confirmed by laser capture microdissection followed by mass spectrometry. Moreover, the

97 differential decrease of amyloid-like and amyloid structures during germination and seedling  
98 growth, and its correlation with specific germination parameters, confirms the role of SSPB  
99 amyloid composites in seed germination.

100

## 101 **Materials and Methods:**

102 **a. Materials:** Congo red (CR), thioflavin-T (ThT), acid fuchsin, 4',6-diamidino-2-  
103 phenylindole (DAPI), papain, gibberellic acid (GA<sub>3</sub>), abscisic acid (ABA), phenyl methyl  
104 sulfonyl fluoride (PMSF), casein, ninhydrin, bovine serum albumin (BSA), sodium  
105 dodecyl sulphate, acrylamide, tetramethylethylenediamine, heptapeptide GNNQQNY and  
106 trypsin gold (mass spectrometry) were obtained from Sigma Aldrich. Proteostat<sup>®</sup>  
107 aggregation assay kit was obtained from Enzo Life Sciences. Calcofluor white, xylene,  
108 ethanol, neutral buffered formalin (4%) and Pierce BCA kit were procured from Thermo  
109 Scientific. Paraplast for embedding was procured from Leica. Cellulase enzyme was  
110 obtained from SRL Chemicals. Dithiothreitol and iodoacetamide were procured from  
111 Merck. For desalination of the protein samples, Millipore C18 Ziptips were used. All  
112 other commonly used chemicals were obtained from Merck.

113

114 **b. Sectioning of the seeds and control samples:** Seed processing was done as per the  
115 standard protocols. (Wood *et al.*, 2011; Jääskeläinen *et al.*, 2013) Briefly, the seeds were  
116 halved and fixed in 4% neutral buffered formalin overnight. These were dehydrated with  
117 successive gradients of ethanol (30-100%) and permeated with paraplast to cut 8-12 µm  
118 sections (using Leica Microtome). The human fat biopsy tissue and potato tubers were  
119 processed similarly. Heptapeptide GNNQQNY fibrils were prepared in 1X PBS at a  
120 concentration of 2400 µM. The formed fibrils after 8 days were spotted on glass slides and  
121 stained.

122 For **staining**, the slides were rehydrated and dipped in coplin jars containing the staining  
123 solution. Acid fuchsin (0.35%) and calcofluor white (10% v/v) were applied on the slides  
124 for 1 minute and DAPI (100 nM) was applied for 10 minutes in dark. Saturated solution of  
125 CR (80%) was applied for 20 minutes. Proteostat<sup>®</sup> dye was used according to the  
126 manufacturer's protocol. For ThT (acidified pH 4.5, 20 µM), and Proteostat<sup>®</sup> staining, 10

127  $\mu$ L of the dye were added on the tissue sections or on slide spots in case of heptapeptide  
128 fibrils.(Navarro & Ventura, 2014) To ensure that the nuclei are not considered during  
129 quantification, we used a dual staining system of ThT and nucleus-specific DAPI. (**Figure**  
130 **S4 i1-i2)**

131 Bright-field and fluorescence images were collected using Leica DM2500 fluorescent  
132 microscope equipped with cross-polarizers. ThT signal of seed sections was visualized by  
133 Leica TCS SP5 confocal system using He-Ne 488 laser (at 20% laser power) at 10X and  
134 40X (under oil emersion).

135 **c. Isolation of protoplasts from wheat and mungbean:** The protoplasts from aleurone and  
136 cotyledon cells were isolated according to previously established protocols.(Taiz & Jones,  
137 1971; Jacobsen *et al.*, 1985) Briefly, 0.5 g wheat grains were de-embryonated, cut into  
138 quarter grains, and incubated in 10 mM arginine and 10 mM calcium chloride for 72  
139 hours. After this, the endosperm was removed from the quarter grains under a dissection  
140 microscope to ensure protoplast isolation only from aleurone layer. The remaining tissue  
141 was incubated in cellulase solution (1 mg/ml, 0.3 units/mg) for 48 hours to free the  
142 protoplasts. For mungbean seeds, 0.5 g seeds were cut into 0.5-1 mm sections. These were  
143 incubated in cellulase solution (0.5 mg/ml, 0.3 units/mg) and swirled gently for 4-6 hours  
144 to free the protoplasts. The mungbean protoplasts show the typical structure of each  
145 cotyledon cell without cell wall and a cotyledon matrix with starch granules and SSPB.  
146 The wheat protoplasts of aleurone layer show a matrix devoid of starch, but SSPB  
147 presence is evident, as is typical for aleurone cells.

148 **d. Isolation and analysis of seed storage protein bodies (SSPB):** A protoplast count of  
149 10000/ml (counted using hemocytometer) was used for SSPB isolation, and these were  
150 isolated using previously established protocols. (Bethke *et al.*, 1996; Antonets *et al.*,  
151 2020) The protoplasts were added to double amount of lysis buffer containing 100 mM  
152 KCl, 2 mM MgCl<sub>2</sub>, 100 mM CaCl<sub>2</sub>, 50 mM sorbitol and 0.5% Triton-X at pH 7.2 in a  
153 chilled tube and incubated for 2 hours. The samples were layered on sucrose density  
154 gradients (20, 50 and 70%) and centrifuged at 37000g for one hour at 4°C. The SSPB  
155 were isolated from 50-70% layer (visualized the fractions and checked for SSPB  
156 presence). The isolated SSPB were centrifuged at 30000g for 30 minutes and

157 resuspended in Tris-HCl (10 mM) buffer at pH 7.5. **For water-soluble albumin and**  
158 **salt-soluble globulin fraction isolation and physicochemical characterization of**  
159 **SSPB, please refer to Supplementary Section 1.**

160 **e. Germination conditions and parameters:** For checking germination parameters, each  
161 treatment was applied to 20 seeds (n=3). For detailed treatment, please see  
162 **Supplementary Section 1.** For germination, the seeds were first sterilized in 0.1%  
163 sodium hypochlorite, rinsed thrice in distilled water and placed on culture dishes with  
164 water or the exogenous molecules. The plates were sealed to reduce moisture evaporation  
165 and the seeds were incubated at 25±2°C, 12h dark/light photoperiod, 50±10% moisture  
166 growth chamber. The germination parameters including germination speed, rate and  
167 index were calculated. Germination speed is the average time after which 50% of the  
168 seeds have germinated. Germination rate is the percentage of seeds germinated whereas  
169 germination index is the ratio of germination percentage of treated seed vs. control.  
170 Germination was considered to be completed with 1 mm radicle protrusion. However, the  
171 experiment was conducted partially through post-germination phases as long as the seeds  
172 could be processed.

173 **f. Laser capture micro-dissection (LMD) and MS/MS analysis of the amyloid-**  
174 **containing tissues and protein fractions:** For LMD, 4-5 µm sections from mungbean  
175 and wheat (0 hour and 72 hours imbibition) were collected on glass slides. The 0-hour  
176 sections were stained with either CR or ThT and acid fuchsin. The 72-hour sections were  
177 stained with only CR to detect the changes in the amyloid proteins, as compared to 0-  
178 hour of imbibition (since by this time-point, the ThT-positive structures are almost not  
179 detectable). The earlier germination time-points were not considered, in order to capture  
180 significant changes in the type of amyloidogenic proteins. Leica LMD 7 was used to cut  
181 amyloid or amyloid-like regions (CR or ThT positive) and as negative controls, acid-  
182 fuchsin stained regions were cut. For sample cutting, both bright-field and fluorescence  
183 were used to demarcate the amyloid regions as is typically followed for amyloid  
184 diagnosis pipeline.(Nijholt *et al.*, 2015) For each sample, 100,000 µm<sup>2</sup> of area was cut to  
185 enable significant protein extraction (n=3). For processing of the LMD samples further  
186 for MS/MS, please refer to **Supplementary Section 1.**



187 **g. Computational analysis:** The secondary structure content of each protein was performed  
188 by UniProt, PDB, Pfam and JPred web servers. Aggrescan webserver was used to predict  
189 the potential amyloidogenic aggregation-prone regions in each of these sequences.

190 **h. Statistical and image analysis:** Origin Pro 9.1 was used to plot all the graphs and t-test  
191 was used to analyse the statistical significance between the data pairs. ImageJ and Leica  
192 Las X software were used to analyse the microscopy images. Each experiment is  
193 performed at least thrice (n=3) to obtain statistically significant results.

194

195

## 196 **Results:**

197 **Detection and confirmation of amyloid presence in seeds using combinatorial amyloid-**  
198 **specific probes:** Before using amyloid-specific probes to detect amyloid presence in the seed  
199 storage protein bodies (SSPB), the seed tissue sections were dual stained with acid fuchsin and  
200 calcofluor white to visualize the proteinaceous and glucan-rich regions.(Burton & Fincher, 2014)  
201 It is essential to demarcate these two biochemical compartments since cellulose and  $\beta$ -glucans  
202 found in the cell walls of seed cells, also bind to Congo red (CR), a gold-standard dye for  
203 amyloids.(Herrera-Ubaldo & de Folter, 2018) Moreover, previously plant carbohydrates were  
204 referred to as amyloids due to their binding with iodine complexes and thus might result in  
205 nomenclature misperceptions.(Kooiman, 1960)

206 As shown in **Figure 1**, the seed coat, aleurone layer, subaleurone and endosperm cytoplasm of  
207 wheat and barley (**Figure 1 a1-a3**) and cotyledon cell-matrix of mungbean and chickpea seed  
208 sections (**Figure 1 b1-b3**) are stained with acid fuchsin and exhibit a pinkish-magenta colour on  
209 binding with proteins. Calcofluor white staining leads to a blue-fluorescence in the cell wall  
210 areas of barley (**Figure 1 a3**) and mungbean (**Figure 1 b3**) and represent glucan-rich regions. To  
211 further confirm the integrity and structural features of the seed sections, scanning electron  
212 microscopy (SEM) was performed on wheat and mungbean. In **Figure 1 c1-c2**, protein matrix of  
213 the aleurone and cotyledon cells is visibly intact, and corroborates with the structural features  
214 observed in the literature.(Kesari & Rangan, 2011)

215 To demarcate amyloid or amyloid-like deposits in the seeds, we chose Thioflavin-T (ThT) as the  
216 first probe. It is one of the most popular dyes for amyloid or amyloid-like aggregate detection  
217 and studying *in-vitro* aggregation kinetics.(Biancalana & Koide, 2010; Boke *et al.*, 2016) ThT  
218 dataset was validated by another molecular rotor, Proteostat<sup>®</sup> to negate the possible artefacts  
219 resulting due to utilization of a single probe. It is a recently discovered probe, designed to detect  
220 intracellular and extracellular amyloids or amyloid-like deposits, even if the amyloidogenic  
221 proteins are sparse.(Oshinbolu *et al.*, 2018; Laor *et al.*, 2019)

222 For detecting amyloids or amyloid-like aggregates in seeds, wheat (**Figure 1 d1**), barley (**Figure**  
223 **1 d2**) chickpea (**Figure d3**) and mungbean (**Figure d4**) seed sections were stained with ThT and  
224 visualized using confocal microscope (10X images are presented in **Figure S1 a1-a4**). In case of  
225 the wheat and barley seeds, intense fluorescence intensity was observed in the SSPB of protein  
226 matrix of the aleurone cells. The sub-aleurone layer shows intermediate fluorescence while the  
227 endosperm tissue shows non-significant ThT signal. The fluorescence intensity was quantified  
228 using ImageJ for each of these tissues to confirm this (**Figure 1 e1-e2**). A uniform protein signal  
229 in the aleurone, subaleurone and the endosperm layer (**Figure 1 a1-a3**), and significantly intense  
230 ThT signal in only aleurone cells of wheat and barley (**Figure S1 a1-a2**) signifies that although  
231 proteins are evident in all the tissues, amyloid and amyloid-like signals are prominently seen in  
232 the aleurone cells. In the mungbean and chickpea seed sections, the SSPB of cotyledon cell  
233 matrix produces an intense green fluorescence, suggesting presence of amyloid-like structures  
234 (**Figure 1 d3-d4; Figure S1 a3-a4**). In Proteostat<sup>®</sup> stained sections, the images show comparable  
235 pattern similar to ThT-results of barley and chickpea (**Figure 1 f1-f2**), confirming the presence  
236 of amyloid or amyloid-like structures in SSPB.

237 However, *in-situ* staining with ThT is not enough as per the recent amyloid nomenclature  
238 (medical and functional) and detection guidelines. Most *in-situ* studies rely on CR as the gold  
239 standard probe for amyloid detection.(Benson *et al.*, 2020) The optical anisotropy of amyloids on  
240 binding with CR and the resulting signature of apple-green birefringence, enables it as one of the  
241 most reliable methods for detection of amyloids in tissues and clinical samples.(Murphy *et al.*,  
242 2001; Benson *et al.*, 2020) To confirm the presence of amyloids in the SSPB of aleurone and the  
243 cotyledon cells, seed sections were stained with CR and the samples were visualized between  
244 cross-polarizers.(Murphy *et al.*, 2001; Benson *et al.*, 2020) A characteristic apple-green

245 birefringence of amyloids was observed in the aleurone SSPB of wheat (**Figure 1 g1-g2**) and  
246 barley (**Figure 1 g3-g4**) (**Movie S1**). Fascinatingly, unlike ThT and Proteostat<sup>®</sup> staining, which  
247 showed intense signal in the whole proteinaceous region of the aleurone cells, CR-induced  
248 birefringence was observed in some of these regions. Similar case was observed for the  
249 cotyledon cells of chickpea (**Figure 1 h1-h2**) (**Movie S2**) and mungbean (**Figure 1 h3-h4**). The  
250 presence of CR-stained amyloids interspersed between amyloid-like structures suggests a  
251 composite structure of seed storage proteins.

252 To represent the inherent birefringence or autofluorescence of the tissue sections, the unstained  
253 sections were imaged using the polarizer and fluorescent microscopy, using same imaging  
254 parameters as that of stained sections and exhibited neither significant autofluorescence nor  
255 birefringence (**Figure S1 b1-b8**). For positive control, human abdominal fat biopsy of a positive  
256 amyloid patient, (**Figure S1 c1-c2**) (Ghosh *et al.*, 2021) and amyloid fibrils of Sup35-N terminal  
257 fragment heptapeptide GNNQQNY (**Figure S1 c3-c4**) were stained with ThT and Proteostat<sup>®</sup>  
258 probes with same parameters as seed samples. Potato tubers (**Figure S1 c5-c6**) were chosen as  
259 the negative control, since these are rich in carbohydrates instead of proteins.(Shewry, 2003)  
260 Wheat endosperm tissue was used as another negative control, since it shows minimum signal  
261 with both probes (**Figure S1 c7-c8**). ThT and Proteostat<sup>®</sup> staining therefore suggest that wheat,  
262 barley, chickpea and mungbean seeds contain innate amyloid-like structures. As control of CR  
263 staining, the same tissue/fibrils used in ThT/Proteostat were used. (**Figure S1 d1-d8**). To further  
264 corroborate amyloid-specific probe binding (fluorescence and birefringence), the glucan-rich cell  
265 walls of seed sections were digested with cellulase enzyme. Interestingly, although absence of  
266 Calcofluor white staining confirmed cell wall removal, CR-positive amyloid regions were  
267 evident. (**Figure S2 a-c**). A control section without cellulase treatment (**Figure S2 d**) shows  
268 glucan-rich regions by Calcofluor white. Further, simultaneous staining of seed sections with  
269 Calcofluor white and ThT show non-overlapping spatial distribution of amyloids and glucans  
270 (**Figure S2 e-f**). For unambiguous probe binding, the results are validated on protoplasts (cells  
271 without cell walls) and are discussed in the later sections.

272

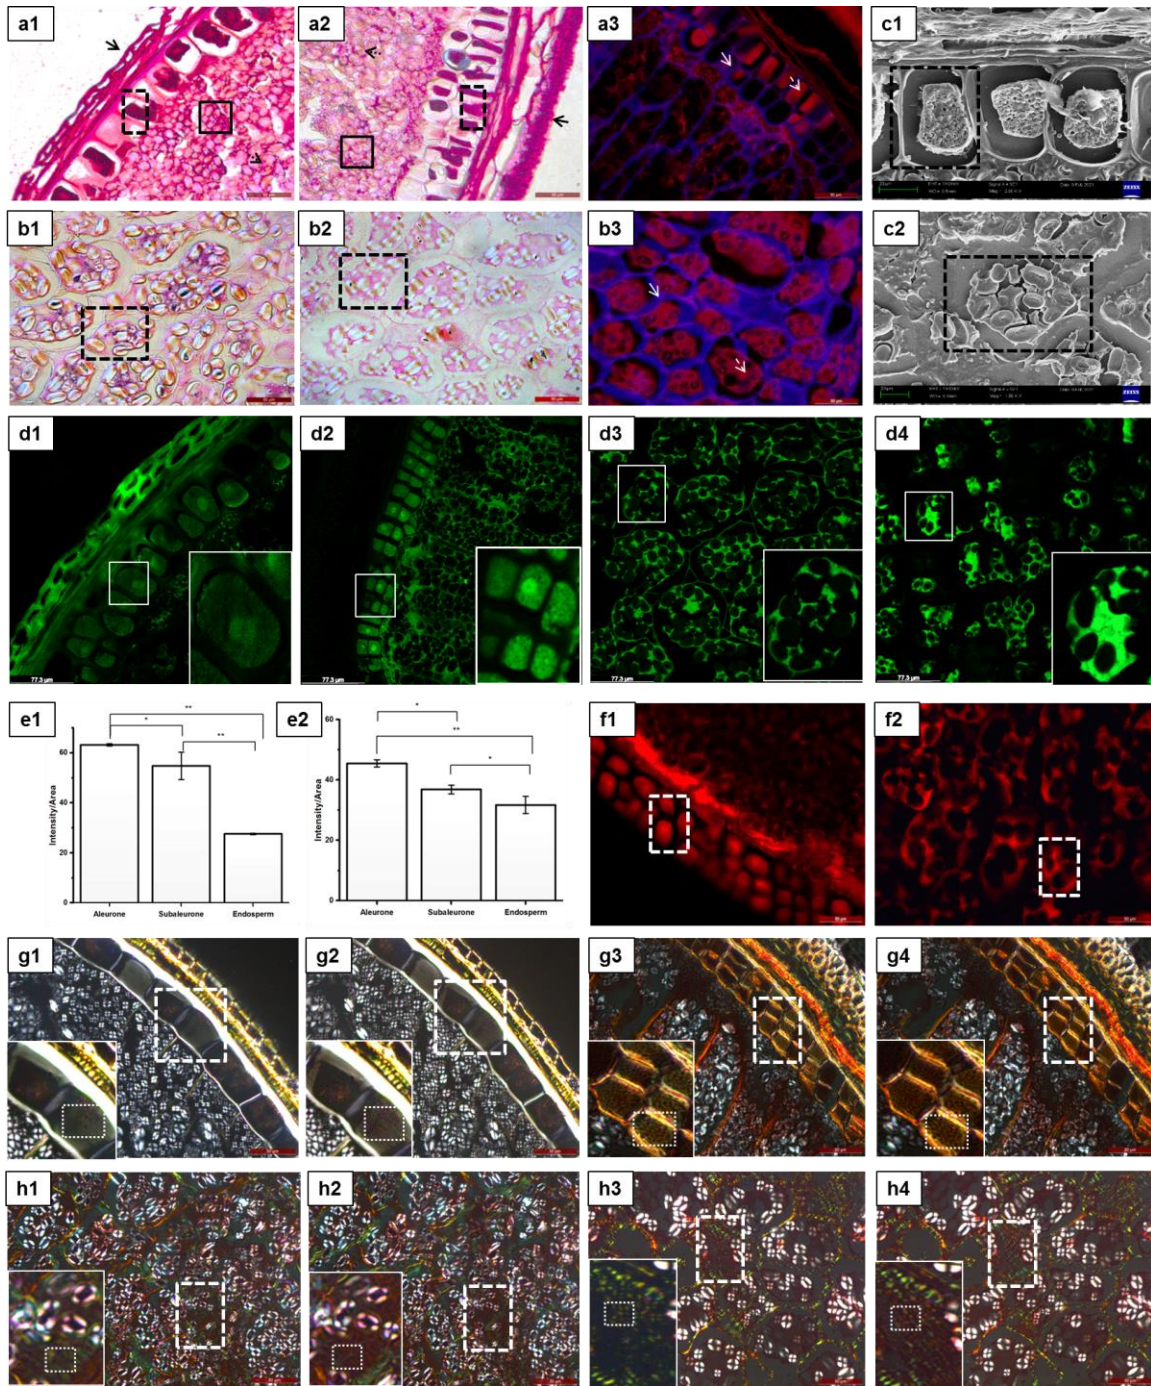

273

274 **Figure 1 Analysis of amyloid structures in proteinaceous regions of seed sections.** The protein-  
 275 specific dye, acid fuchsin, exhibits characteristic magenta colour in the seed coat (solid black arrow),  
 276 aleurone (black dashed boxes), subaleurone cells (solid black box) and endosperm cells (black dashed  
 277 arrow) of wheat (*Triticum aestivum*) (a1) and barley (*Hordeum vulgare*) (a2). In the dicot seeds, the stain  
 278 is visible in the SSPB of cotyledon cells (black dashed boxes) of chickpea (*Cicer arietinum*) (b1) and  
 279 mungbean (*Vigna radiata*) (b2). In dual staining of acid fuchsin and calcofluor white, the barley aleurone  
 280 cells (a3) and mungbean cotyledon cells (b3) exhibit red fluorescence in proteinaceous regions, whereas  
 281 calcofluor white produces blue fluorescence in cell wall regions. Solid white arrows represent cell walls,  
 282 whereas dashed white arrows represent the SSPB. SEM (Scanning Electron Microscopy) analysis of

283 wheat (c1) and mungbean (c2) reveal that the structure of the aleurone and cotyledon cells is maintained  
284 after histological processing. The black dashed box represents an individual aleurone or cotyledon cell  
285 with visible intact protein matrix. Gamma value for each acid fuchsin/calcofluor white image ranges from  
286 0.6-0.7, the changes in brightness/contrast has been applied to the whole image. **ThT** staining of both  
287 wheat (d1) and barley (d2) seed sections, exhibit an intense fluorescence in the aleurone layer,  
288 suggesting an enrichment of amyloid-like protein aggregates in the aleurone layer. The dicot seeds of  
289 chickpea (d3) and mungbean (d4) exhibit an intense ThT signal in the SSPB of cotyledons. The white  
290 solid lined boxes represent fluorescing areas. The insets represent magnified portions of the solid-lined  
291 boxes. The bar graphs represent each type of tissue's intensity/area ratio, i.e., for aleurone, sub-aleurone  
292 and endosperm in wheat (e1) and barley (e2). The ratio of five z-stacks are averaged for this purpose and  
293 plotted as bar graphs with error bars representing standard error of the mean. Student's t-test is  
294 performed for statistical analysis. In (e1) \*p=0.02, \*\*p=0.001; (e2) \*p=0.015, \*\*p=0.003. Gamma and  
295 intensity value for each confocal image is kept same for quantification purposes. **Proteostat**<sup>®</sup> staining  
296 exhibits that the monocot seeds of barley (f1) and dicot seeds of chickpea (f2) demonstrate the presence  
297 of possible amyloids or amyloid-like aggregates in the SSPB of aleurone and cotyledon cells as evident  
298 from the red fluorescence in these areas. White dashed boxes represent the intense signal in a  
299 representative area. Gamma values for each ThT and Proteostat<sup>®</sup> image range from 1.8-2.0, changes in  
300 brightness/contrast have been applied to the whole image. **Confirmation of amyloids in seed sections  
301 by CR staining.** The typical green-to-red birefringence when the sample is placed between two polarisers  
302 at 40X magnification is shown. Both wheat (*Triticum aestivum*) (g1-g2) and barley (*Hordeum vulgare*) (g3-  
303 g4) aleurone cells show a visible change in the apple-green birefringence, characteristic of amyloids as  
304 indicated by the white dashed boxes and the insets. Similar changes in birefringence are observed in  
305 some regions of the SSPB of cotyledon cells of chickpea (h1-h2) (*Cicer arietinum*) and mungbean (*Vigna  
306 radiata*) (h3-h4). Gamma values for each CR image are at 1.0. (Scale bars for acid fuchsin and calcofluor  
307 stained images – 50 µm; for SEM images, scale bar – 20 µm; for ThT confocal scale bar – 77.3 µm; for  
308 Proteostat<sup>®</sup>, scale bar – 50 µm; for CR staining, scale bar – 50 µm).

309

310 ***In-silico* and biophysical characterization of seed storage protein bodies and confirmation**  
311 **of the amyloid and amyloid-like proteins using LMD-MS/MS:** For finding the aggregation  
312 hotspots, web-servers such as Tango, Aggrescan and PASTA are generally used to assess  
313 amyloidogenic tendencies of proteins.(Belli *et al.*, 2011) Aleurone and cotyledon cells contain  
314 globulins and albumins as the major storage proteins and are therefore analysed for their  
315 amyloidogenic potential. Globulins are well-characterized in terms of sequence and structure in  
316 comparison to albumins. **Figure S2 g-h** represents the secondary structure content of mungbean  
317 8S (UniProt Q198W5), and soybean 11S globulin (UniProt P02858) respectively. These proteins  
318 belong to the cupin superfamily and are composed of  $\beta$ -barrel motifs. When the structural and  
319 sequence information of these proteins were analyzed by Aggrescan, interestingly, the high  
320 aggregation-prone regions were predicted mostly in the  $\beta$ -barrel structures, suggesting a  
321 plausible stacking of the barrels to form amyloids. A similar pattern was observed in other  
322 eukaryotic amyloidogenic proteins such as superoxide dismutase and bovine lactoglobulin

323 **(Figure S2 i-j)**. As evident from the list in **Figure S2 k**, the globulin proteins of most cereals and  
324 pulses show an increased propensity of aggregation hotspots compared to the albumins, further  
325 strengthening that the SSPB globulins might be the major amyloidogenic proteins.

326 Since the SSPB is comprised of albumin and globulin as the major seed storage proteins, we  
327 isolated intact SSPB, and albumin, globulin fractions from SSPB (**Material and Methods d;**  
328 **Supplementary Section 1**). When the SSPB of mungbean (**Figure 2 a**) and wheat (**Figure S3**  
329 **a1**) were analysed by scanning electron microscopy (SEM), they show almost spherical  
330 structures. When the salt-soluble globulin protein fraction and SSPB of mungbean were analysed  
331 by dynamic light scattering (DLS), (**Figure S3 b1-b2**) the former shows a size of 2-30 nm  
332 whereas the SSPB show overall diameter of 400-600 nm and correlates with SEM analysis.  
333 Transmission electron microscopy (TEM) and high resolution TEM analysis of membrane-  
334 removed SSPB exhibit electron-rich morphology and fibrillar structures for both mungbean  
335 (**Figure 2 b1-b3**) as well as wheat (**Figure S3 a2-a4**). ThT and CR staining of the SSPB of  
336 mungbean and wheat (**Figure S3 b3-b4**), reveal green fluorescence and green-to-red  
337 birefringence respectively, characteristic of amyloid structures. The presence of ThT  
338 fluorescence in all the SSPB and CR-positive birefringence in some of these, further confirm the  
339 composite nature of the amyloids and amyloid-like assemblies.

340 Fourier-transformed infra-red spectroscopy (FTIR) can differentiate between the secondary  
341 structures of proteins and their aggregates, and often provide underlying differential signatures.  
342 In IR spectroscopy, the  $\alpha$ -helix signature is found at  $\sim 1654\text{ cm}^{-1}$ , while  $\beta$ -sheets are mostly at  
343  $\sim 1635$  and  $\sim 1684\text{ cm}^{-1}$ . The signature of the  $\beta$ -sheet rich amyloid fibrils are seen to be centered at  
344  $\sim 1610\text{ cm}^{-1}$  to  $1632\text{ cm}^{-1}$  due to changes in the amide I band resulting out of interactions between  
345  $\beta$ -sheets.(Waeytens *et al.*, 2021) The turns and disordered structures are observed at 1670-1690  
346  $\text{cm}^{-1}$ . Bovine serum albumin protein at same concentration was used as a control for the FTIR  
347 experiments.(Ahmad *et al.*, 2016) The water-soluble albumin and salt-soluble globulin fractions  
348 isolated from SSPB, and the intact SSPB of mungbean (**Figure 2 c1-c3**) and wheat (**Figure S3**  
349 **c1-c3**) were analyzed by FTIR. The albumin fraction isolated from the seeds, show predominant  
350 helical structure, (Moreno & Clemente, 2008) while the globulin fraction shows a predominant  
351  $\beta$ -sheet structure at  $1633\text{-}1636\text{ cm}^{-1}$  as expected from their  $\beta$ -barrel rich motifs.(Heyn *et al.*,  
352 2020) Interestingly, the SSPB not only shows the characteristic structural features of globulin,



353 i.e. a predominant  $\beta$ -sheet richness, but also suggests inter-sheet interactions as observed by the  
354 shift of the bands towards  $1616\text{-}1623\text{ cm}^{-1}$ . Further, the helices and turn signatures are apparently  
355 evident, confirming the composite structure of the SSPB.(Sarroukh *et al.*, 2013) The results  
356 suggest that the isolated proteins from SSPB in their soluble state exhibit their characteristic  
357 secondary structure signatures. However, when they assemble in the SSPB, they exhibit  
358 characteristics of amyloid and amyloid-like architecture.

359 Next, we wished to see whether the isolated soluble protein fractions could revert back to their  
360 amyloid state (the structures attained inside SSPB). To achieve this, the mungbean albumin and  
361 globulin proteins were dialyzed against buffer with reduced salt concentration. The albumin  
362 fraction, which is water soluble, (**Figure S3 d1-d2**), shows no amyloid or amyloid-like  
363 signatures with ThT and CR after dialysis. However, the globulin fraction (**Figure S3 d3-d4**) and  
364 mixture of globulin and albumin (**Figure S3 d5-d6**) shows intense signatures of both ThT and  
365 CR. Interestingly, the same is reflected in the FTIR signatures of mungbean proteins. Dialyzed  
366 albumin shows  $\alpha$ -helical and disordered structures while, dialyzed globulin shows a shift of the  
367  $\beta$ -barrel structures towards  $1623\text{ cm}^{-1}$ , indicating amyloid formation. Further, a mixture of  
368 globulin and albumin (4 hours) show significant amyloid signatures and minor secondary  
369 structures (helices and turns) indicating a transition to amyloid composite form (**Figure 2 d1-**  
370 **d3**). Therefore, based on amyloid-specific probe staining and FTIR studies, it is confirmed that,  
371 the globulin fraction or the mixture of globulin and albumin fractions can attain the amyloid  
372 composite state.

373 To further confirm the amyloidogenicity of SSPB fibrils and *in-vitro* reconstituted fibrils, these  
374 were analysed to check fibrillation kinetics, detergent resistance and x-ray diffraction signatures.  
375 The fibrillation kinetics of isolated and dialyzed globulin proteins of wheat and mungbean was  
376 monitored by ThT binding assay for different dialysis time-points. An increase in ThT  
377 fluorescence with increase in dialysis time, confirms the formation of amyloid structures (**Figure**  
378 **S4 a**). These amyloid structures were analysed by TEM to check their fibrillar morphologies  
379 (**Figure S4 b-c**). Next, the detergent resistance of the SSPB and isolated protein fraction fibrils  
380 were checked by SDS-PAGE. For this purpose, the disrupted or undisrupted SSPB fibrils,  
381 (**Figure S4 d**) and globulin fibrils (**Figure S4 e**) were boiled with SDS for different time-points  
382 (0-120 minutes). Without boiling, no bands for the samples are observed, suggesting that the

383 constituent structures are unable to be resolved due to the large size of fibrillar aggregates.  
384 However, with increase in boiling time, more bands appear, suggesting that the fibrils are  
385 resistant to boiling in detergent for a particular time-point, but lose their detergent resistance  
386 after prolonged boiling. The control albumin (15-30 kDa) and globulin (30-60 kDa) isolated in  
387 their soluble form, (Quintieri *et al.*, 2012; Yi-Shen *et al.*, 2018; Kusumah *et al.*, 2020) show their  
388 characteristic bands in gel. Powder X-ray diffraction of SSPB fibrils and isolated globulin  
389 aggregates was further performed to check the amyloidogenic signature reflections. In the SSPB  
390 fibrils of both wheat and mungbean, the equatorial and meridional reflections of amyloid  
391 structures are evident (diffused reflection at 1 nm and sharp reflection at 0.44 nm). Additionally  
392  $\alpha$ -helix (0.28 nm and 0.18 nm) and  $\beta$ -sheet (0.3 nm) specific reflections are seen, owing to the  
393 composite nature of the SSPB fibrils. For the isolated and dialyzed globulin fibrils of wheat and  
394 mungbean, primarily diffused amyloid-specific reflections were obtained. (**Figure S4 f**)  
395 (Eisenberg, 2003; Madine *et al.*, 2008; Chakraborty *et al.*, 2022) Together, the biophysical  
396 analysis confirms the amyloid nature of the SSPB fibrils and the ability of globulin proteins to  
397 attain the amyloid composite state.

398 Since the amyloidogenicity was indicated by the globulin protein fraction on dialysis, we wanted  
399 to confirm the major amyloidogenic proteins. For this, we performed laser capture  
400 microdissection (LMD) of CR positive, ThT positive and acid fuchsin positive fluorescent  
401 regions of wheat and mungbean sections. As representative examples, **Figure 2 e1 and f1**  
402 represents CR stained fluorescing areas of mungbean and wheat. **Figure 2 e2 and f2** represent  
403 the areas after dissection. This was followed by protein trypsinization and nano-LC-MS/MS for  
404 peptide fingerprinting of the dissected samples and the isolated SSPB. **Figure 2 g-h** represents  
405 the top four representative proteins predicted with highest confidence score (>95%) in case of  
406 wheat and mungbean. In both seeds, the CR-positive amyloid area is composed of mainly  
407 globulins. On the other hand, the ThT-positive area and SSPB in these seeds have globulins  
408 along with other proteins, suggesting the sequestration of soluble proteins inside the amyloid  
409 structures. To further confirm that the protein fractions isolated from SSPB, are actually the  
410 albumin and globulin fractions, these were also analyzed using MS/MS. **Table S1** shows the top  
411 scoring proteins of mungbean and wheat. The salt-soluble globulin fraction of both seeds is  
412 enriched in globulin proteins. The presence of seed storage albumin was evident in mungbean  
413 but not wheat, since albumin sequences of wheat are not available in UniProt using which the



414 analysis was done. The number of peptides identified for each protein is represented in **Table S2**.  
 415 The overall data confirms that globulins are the predominant amyloidogenic proteins in the  
 416 SSPB and reflects on their composite nature. Further, the fibrillar nature of the amyloids in the  
 417 SSPB is established, along with their amyloid-specific spectroscopic and diffraction properties.

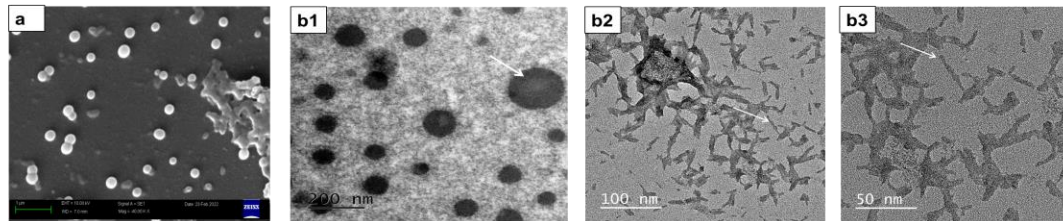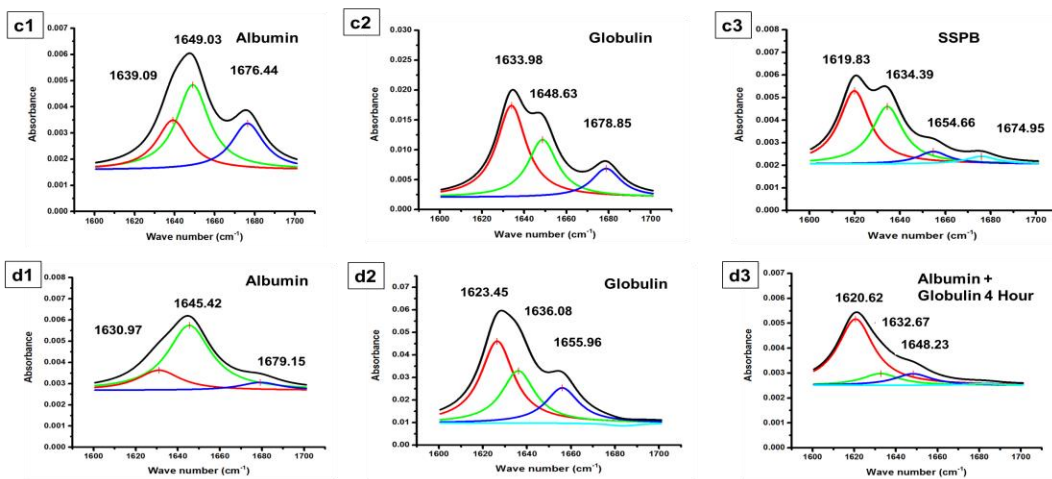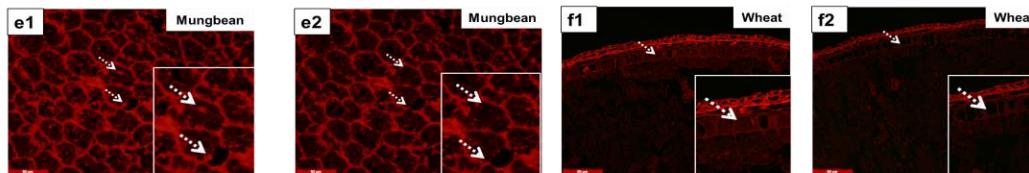

| g<br>Wheat  | Congo red positive                       | Congo red negative      | ThT positive                                      | ThT negative | Protein body |
|-------------|------------------------------------------|-------------------------|---------------------------------------------------|--------------|--------------|
|             | Globulin 3                               | Ubiquitin               | Globulin 3A                                       | Histone H4   | Globulin 3A  |
| Globulin 3A | Genome assembly protein                  | Globulin 3A             | Actin                                             | HMW glutenin |              |
| Globulin 3B | Actin                                    | Genome assembly protein | Histone H2A                                       | Globulin 1   |              |
| Globulin 1  | Glyceraldehyde-3-phosphate dehydrogenase | Em protein              | Reversed protein-kinase domain containing protein | Beta amylase |              |

  

| h<br>Mungbean                    | Congo red positive                       | Congo red negative                      | ThT positive                      | ThT negative             | Protein body             |
|----------------------------------|------------------------------------------|-----------------------------------------|-----------------------------------|--------------------------|--------------------------|
|                                  | 8S Globulin beta isoform                 | Histone                                 | Vicilin like seed storage protein | Actin                    | 8S Globulin beta isoform |
| Beta conglycinin beta chain-like | Glyceraldehyde-3-phosphate dehydrogenase | Beta conglycinin b chain-like precursor | Elongation factor-1               | 8S globulin alpha        |                          |
| 8S globulin alpha                | Mungbean seed albumin                    | Glycinin G4                             | Mungbean seed albumin             | Basic 7S globulin-2-like |                          |
| Beta conglycinin alpha chain     | Late embryogenesis abundant protein      | Mungbean seed albumin                   | Formate dehydrogenase             | Mungbean seed albumin    |                          |

419 **Figure 2 Analysis of the physicochemical properties of the seed storage protein bodies and**  
420 **confirmation of amyloidogenic proteins:** Representative SEM image (a) of isolated SSPB of  
421 mungbean, reflecting on the globular shape and diameter as observed in literature. TEM (b1) and  
422 HRTEM (b2-b3) analysis of the mungbean cotyledon SSPB shows electron-rich aggregates and fibrillar  
423 structures upon removal of SSPB membrane. The white arrows point to the electron-rich structures of  
424 SSPB and their fibrillar nature. FTIR analysis of the secondary structure content of water-soluble albumin,  
425 salt-soluble globulin fraction and the SSPB of mungbean reveal that albumin consists of helical, sheet  
426 and turn structures while globulins have predominant  $\beta$ -sheet signatures as evident by the major peak at  
427  $1633\text{ cm}^{-1}$ . The SSPB on the other hand, shows evidence of amyloids by the shift towards  $1619\text{ cm}^{-1}$  (c1-  
428 c3). Dialyzed albumin of dicot mungbean shows the characteristic predominant helical signatures similar  
429 to native protein isolated previously. Dialyzed globulins however show a shift towards  $1623\text{ cm}^{-1}$  of the  $\beta$ -  
430 sheets, suggesting intersheet interactions of globulin at low salt concentration. On mixing and incubation  
431 for 4 hours, the  $\alpha$ -helix and the disordered structures decrease, while intersheet interactions become  
432 more prominent, suggesting an increase in the overall amyloid signature (d1-d3). The LMD cut sections  
433 before and after dissections are shown for mungbean (e1-e2) and wheat (f1-f2). The arrows represent the  
434 CR-positive protein matrix cut regions. The inset boxes represent the magnified portions of the cut  
435 regions. The proteins found after MS/MS of CR-positive amyloid areas, ThT-positive amyloid-like areas  
436 and SSPB is represented in (g) and (h) (>95% confidence) (Scale bar of SEM -1  $\mu\text{m}$ , TEM - 200 nm,  
437 HRTEM - 100 and 50 nm, LMD - 50  $\mu\text{m}$ ).

438

439 **Functional role of amyloids during germination:** Since amyloid-containing protein bodies in  
440 other organisms such as bacteria, perform functional roles, we hypothesized that SSPB amyloid  
441 composites might regulate seed physiological functions including germination.(Santos &  
442 Ventura, 2021) Classically, in *sensu stricto*, germination begins with water uptake by the seed  
443 (imbibition) and ends with the emergence of the embryonic axis, usually the radicle, through the  
444 structures surrounding it. To establish the role of SSPB amyloid composites during seed  
445 germination, wheat and mungbean seeds were imbibed in water and were monitored through the  
446 germination *sensu stricto* and post-germination phase, i.e. radicle elongation. At different time-  
447 intervals, the seeds were fixed, sectioned and stained with CR and ThT to detect the changes in  
448 the amyloids and amyloid-like structures. In the wheat seed sections, **(Figure 3 a1-a14)** the  
449 amyloid structures (CR-positive) were present till 48 hours but were not detectable at 72 and 96  
450 hours in the aleurone cells, suggesting a possible degradation of these structures. In the  
451 mungbean seed sections **(Figure 3 b1-b10)**, the amyloids were detected upto 72 hours,  
452 suggesting that till these time-points, amyloids were not degraded to the full extent. For the dicot  
453 seeds, tissue processing was not possible beyond 72 hours due to fragile nature of the seeds. The  
454 representative seeds at each time-point are shown in **Figure 3**.

455 In order to detect the changes in amyloid-like structures, the seed sections were stained with ThT  
456 after allowing germination and seedling growth upto 96 hours in wheat and 72 hours in

457 mungbean. The ThT fluorescence of the seed sections was further compared to the CR  
458 fluorescence of the seed sections at the same time-points to quantify the changes in amyloid-like  
459 vs amyloid assemblies. The wheat seeds (**Figure S5 a1-a6 and Figure 3 c1**) show a decrease in  
460 ThT fluorescence intensity apparent from 8 hours while CR fluorescence decreases from 72  
461 hours onwards (**Figure S5 b1-b6 and Figure 3 c2**). Acid fuchsin staining of the germinated seed  
462 sections however depicts that the proteinaceous intensity decreases initially, but then remains  
463 stable throughout as shown in (**Figure S6 a-f and I1**). In the mungbean seed sections (**Figure S5**  
464 **c1-c5 and Figure 3 c3**), the ThT fluorescence of SSPB shows a decrease in intensity from 24  
465 hours, whereas the CR and acid fuchsin fluorescence remains similar till 72 hours as shown in  
466 (**Figure S5 d1-d5 and Figure 3 c4**) and (**Figure S6 g-k and I2**). This shows that although less-  
467 stable amyloid-like structures are degrading, the more-stable amyloids degrade slowly and the  
468 overall protein content decreases first, and then becomes stationary (**Figure S7 a**). The results  
469 suggest that the degradation of amyloids is accompanied or preceded by an upregulation of the  
470 soluble proteins including proteases and metabolic enzymes, thus maintaining the overall protein  
471 content (Han *et al.*, 2013) and indicate towards a significant role of the amyloid degradation in  
472 germination.

473 To corroborate the properties of SSPB on similar lines, the isolated SSPB fibrils at each time-  
474 point of germination (0-72 hours) were analysed by SDS-PAGE. As evident in **Figure S7 b**, both  
475 wheat and mungbean SSPB at 0 hour, show no significant bands, suggesting the presence of  
476 fibrillar structures. However, with increase in time-points, the water-soluble albumin proteins  
477 (10-30kDa) and the salt-soluble globulin protein (43-71 kDa) bands become significant,  
478 suggesting their release from the fibrillar state. The results confirm that there is a step-wise  
479 release of proteins during germination.(Quintieri *et al.*, 2012; Yi-Shen *et al.*, 2018; Kusumah *et*  
480 *al.*, 2020) The LMD samples of CR positive areas of wheat after 72 hours of germination show a  
481 drastic decrease in the types of globulin proteins, whereas the mungbean samples show  
482 significant globulin presence. This validates our germination data where wheat amyloids decline  
483 by 72 hours, but mungbean amyloids are evident till this time. (**Figure 3 d**)

484 SEM analysis of wheat (**Figure S5 e1-e2**) and mungbean seed (**Figure S5 f1-f2**) after 72 hours  
485 after imbibition shows a decrease in the overall SSPB content in the individual cells when  
486 compared to the 0 hour results. When the SSPB and globulin fraction isolated during different

487 time-points for wheat and mungbean (**Figure S5 g1-g2**) are analysed for ThT, the globulin  
488 fraction shows baseline fluorescence. The SSPB however, show maximum fluorescence at 0  
489 hours, which then decreases with germination, confirming loss of amyloid characteristics. When  
490 the same SSPB from wheat and mungbean (**Figure S5 h1-h2**) were analysed by FTIR, after 72  
491 hours, the SSPB show a decrease in the relative predominance of the amyloid signatures and an  
492 increase in disordered structures. MS-MS analysis of the protein bodies after 48 h post-  
493 imbibition, also show a decrease in abundance of some globulin proteins. (**Figure S7 c**)

494 To further link the role of amyloid structures in germination, we incubated the water-soluble  
495 albumin, salt-soluble globulin, their dialyzed aggregated form and the SSPB with the purified  
496 seed endoproteases. (Supplementary Section 1) At each time-point, (0-8 hours) the dialyzed  
497 aggregated globulin fraction shows a slower release as compared to the soluble counterpart. On  
498 the other hand, SSPB shows the slowest release compared to the other fractions. To check  
499 whether the SSPB lipid membrane causes slower release, we removed the SSPB membrane and  
500 followed similar release assay. Despite membrane removal, the release remains significantly  
501 slow, confirming that the sustained release of peptides/amino acid is facilitated by the amyloid  
502 composites. (**Figure S5 i3-i4**)

503 The ThT-CR, MS/MS dataset and the *in-vitro* studies therefore suggest that the presence of the  
504 storage proteins in a composite amyloid structure facilitates sustained degradation during  
505 germination and seedling growth. The overall protein content however, does not decrease  
506 significantly suggesting that endogenous production of soluble proteins (enzymes, metabolic  
507 proteins) might be upregulated simultaneously.

508

509



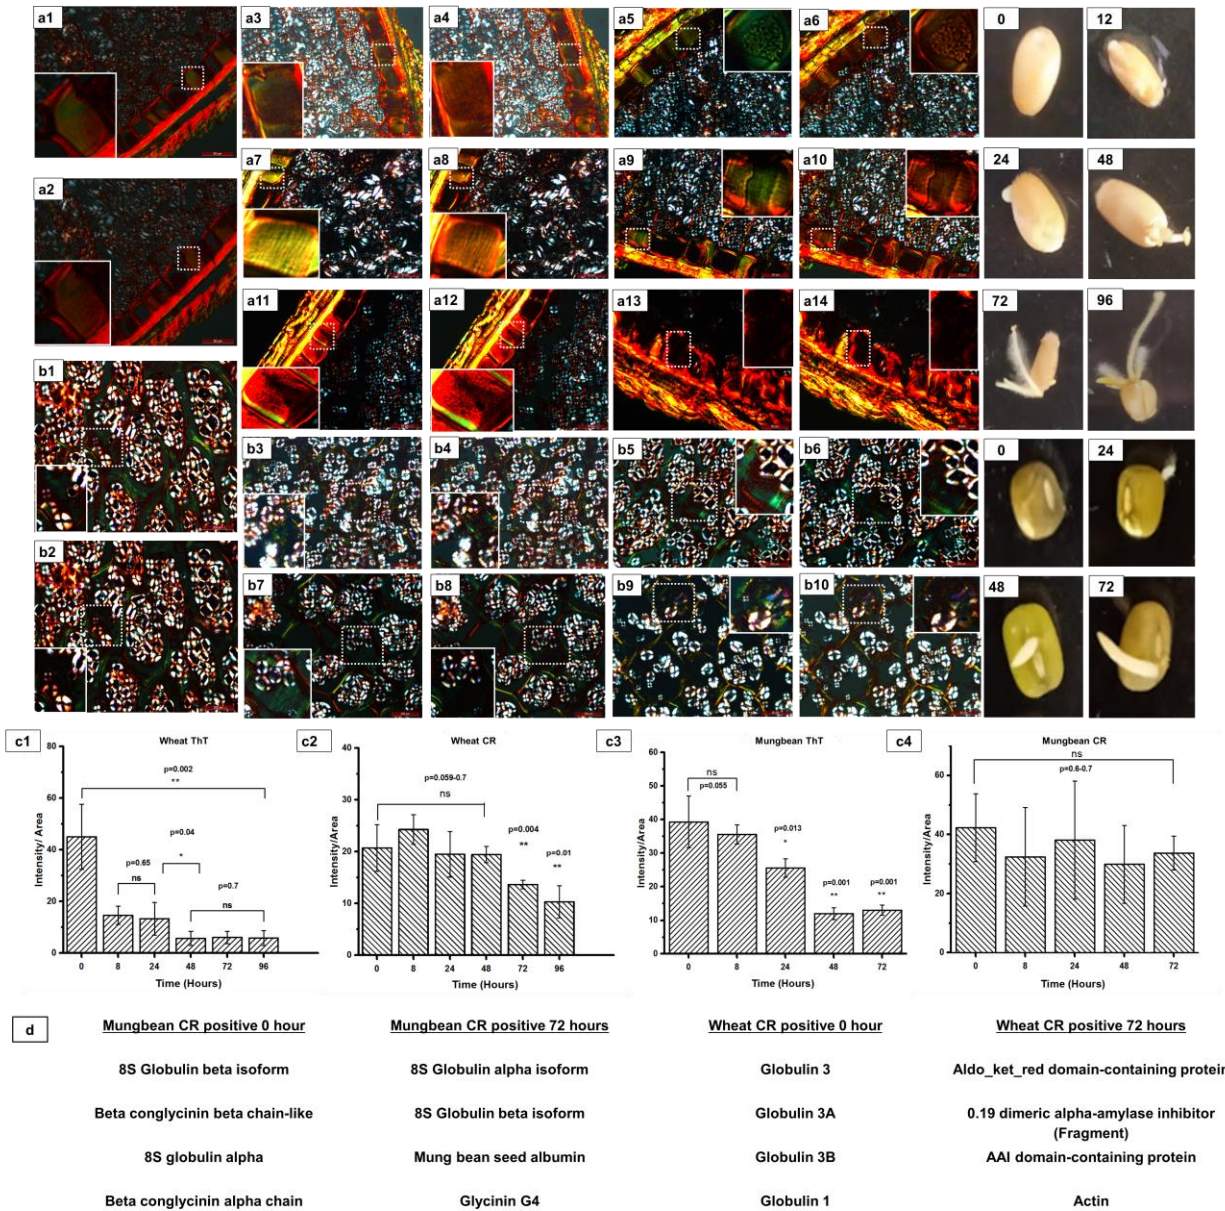

510

511 **Fig 3: Congo red staining of germinated seeds, quantification of CR-ThT fluorescence and MS/MS**  
 512 **analysis of amyloidogenic proteins after germination.** Congo red stained sections of wheat are  
 513 represented for germination at 0 (a1-a2), 4 (a3-a4), 8 (a5-a6), 24 (a7-a8), 48 (a9-a10), 72 (a11-a12) and  
 514 96 (a13-a14) hours, whereas the mungbean seeds were stained at 0 (b1-b2), 8 (b3-b4), 24 (b5-b6), 48  
 515 (b7-b8) and 72 (b9-b10) hours. In case of wheat, the amyloids are evident till 48 hours whereas in  
 516 mungbean, the amyloids are detected throughout all the time-points. White dashed boxes represent CR-  
 517 positive representative areas and solid lined boxes represent the magnified portions of these areas.  
 518 (Gamma value for each image for CR staining is 1.3-1.6) Quantification of the signals are represented as  
 519 ThT of wheat (c1), CR of wheat (c2), ThT of mungbean (c3) and CR of mungbean (c4). ThT signal in  
 520 wheat start decreasing since 8 hours and in mungbean from 24 hours. The CR fluorescence however  
 521 decreases from 72 hours in wheat and does not decrease significantly till 72 hours in mungbean. MS/MS

522 analysis of Congo red positive amyloid areas exhibit the decrease in the type of amyloidogenic globulins  
523 after 72 hours of germination, suggesting their degradation in both wheat and mungbean (d).

524

525 **Linkage of amyloid degradation during germination with upregulation/inhibition of**  
526 **hormones and proteases:** Germination in seeds is regulated by several plant hormones such as  
527 gibberellins (GA) and abscisic acids (ABA). GA further acts downstream to regulate protease  
528 expression after seed imbibition and therefore acts as one of the triggers of germination. ABA,  
529 on the other hand, acts as an inhibitor of GA to maintain dormancy.(Shu *et al.*, 2018) The initial  
530 seed proteases are present inside the SSPB, and can cleave the disulphide bonds of the globulin  
531 proteins and prepare them for further cleavage. The subsequent proteases are expressed in the  
532 cotyledon or aleurone cell cytoplasm and are assumed to cleave the storage proteins. These  
533 endoproteases are primarily of cysteine or serine protease type and can be inhibited by protease  
534 inhibitors including phenyl methyl sulfonyl fluoride (PMSF).(Otegui *et al.*, 2006) Although, GA  
535 leads to a degradation of the seed storage proteins, the underlying mechanism of the degradation  
536 control is not deciphered in details previously. Thus hormones and protease-dependent amyloid  
537 degradation might aid in controlled germination and post-germination phases.

538 To gain an insight into how the amyloids are degraded in response to the hormones and  
539 proteases, the wheat and mungbean seeds were imbibed in water, GA, ABA, GA and PMSF,  
540 ABA and PMSF, and PMSF alone for 72 hours. (**Supplementary Section 1**) It was observed  
541 that, as compared to water (control), (**Figure 4 a1-a4, g-h**), the seeds incubated in GA alone,  
542 (**Figure 4 b1-b4, g-h**) showed decrease in amyloid signal. On the other hand, GA and PMSF  
543 treatment gave stronger amyloid signal, suggesting that amyloid degradation rate is further  
544 decreased in presence of PMSF as compared to normal germination in water. (**Figure 4 c1-c4, g-**  
545 **h**) ABA (**Figure 4 d1-d4, g-h**) and PMSF (**Figure 4 f1-f4, g-h**) imbibition when used  
546 individually, show increased amyloid and amyloid-like content when compared to control,  
547 indicating that the amyloid degradation is inhibited more in these cases. Interestingly, a  
548 simultaneous imbibition with ABA and PMSF treatment, shows maximum amyloid signatures  
549 among all treatments (**Figure 4 e1-e4, g-h**). On analysis of the germination parameters,  
550 (germination speed and germination index), it was observed that the decrease in amyloid signal  
551 in case of GA treatment is accompanied with a faster germination and higher germination index,  
552 while adding PMSF alongside GA counters the effect. Interestingly, the increase/maintenance in

553 amyloid signal (ABA, PMSF individually and together) correlates with a significantly lower  
 554 germination speed and germination index (**Figure 4 i**). Representative seeds and their radicle  
 555 length after 24 hours of imbibition is shown in **Figure 4 j**. Overall, the CR and ThT data and the  
 556 correlation of amyloid presence with germination parameters, suggests that the degradation of  
 557 the amyloid and amyloid-like composites, plays an important role in controlling germination and  
 558 seedling growth.

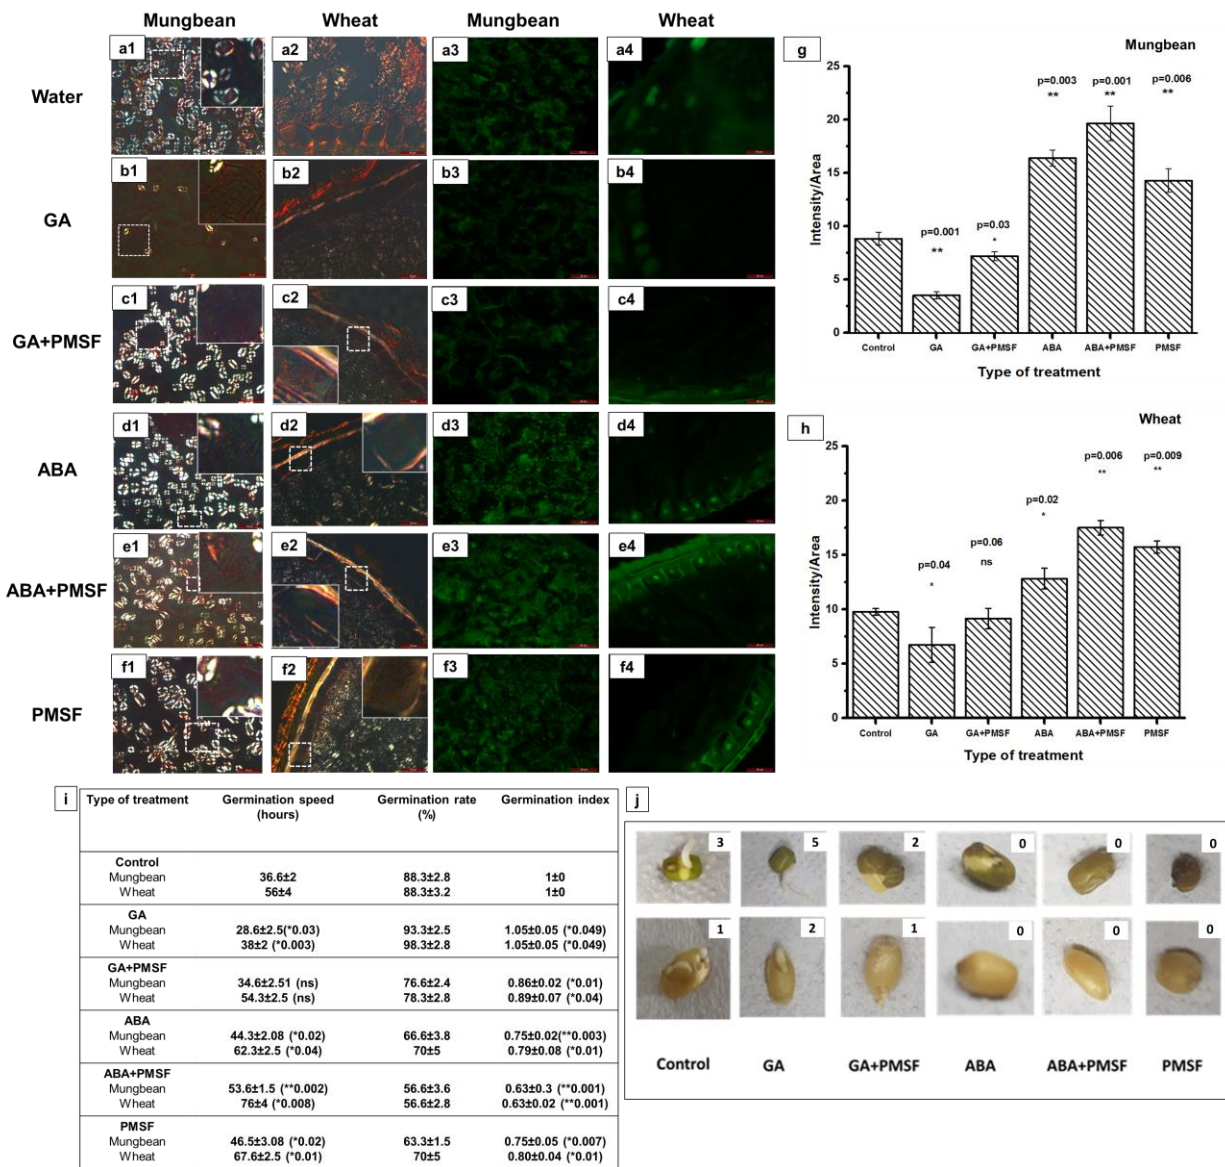

559  
 560 **Figure 4: Exogenous treatment of wheat and mungbean seeds with hormones, proteases and**  
 561 **inhibitors and their link to amyloid degradation during germination.** The mungbean and wheat seeds  
 562 were imbibed with water (a1-a4), GA (b1-b4), GA and PMSF (c1-c4), ABA (d1-d4), ABA and PMSF (e1-  
 563 e4), PMSF (f1-f4). The left two columns represent the CR-stained sections of mungbean (a1-f1) followed



564 by wheat (a2-f2). The white dashed boxes represent the insets and the solid white boxes represent the  
565 magnified portions of the insets. The right two columns represent ThT stained sections of mungbean (a3-  
566 f3) followed by wheat (a4-f4). The ThT signature intensity of the seed sections was further quantified  
567 using ImageJ and plotted (g and h), for mungbean and wheat seed respectively. Bars represent mean  
568 values with error bars as standard error of mean. (Gamma values range from 0.8-1.0, Scale bars for each  
569 image corresponds to 50  $\mu\text{m}$ ). The germination parameters are recorded (i) for 20 seeds total in each  
570 group and the data is average of three such replicates. The radicle length and the representative images  
571 of the seeds after treatment are shown in (j) after 24 hours of germination. The insets represent the  
572 radicle length in mm. The upper panel shows the mungbean seeds whereas; the lower panel shows the  
573 wheat seeds.

574

575 To check the amyloid signals in the physiological context and in a viable state of the cells, we  
576 isolated and used protoplasts. These have an active metabolic state and can be investigated for  
577 the real-time effect of exogenous molecules (Jacobsen *et al.*, 1985) on the amyloid content.  
578 Further, due to absence of cell walls, there is minimum chance of interference in staining. Since,  
579 protoplasts do not require dehydration, fixation or embedding in resin, it negates out the  
580 plausible artefacts caused by tissue processing methods. At first, the presence of amyloids in the  
581 SSPB of the wheat and mungbean protoplasts were shown using ThT (**Figure 5 a1,c1**) and CR  
582 (**Figure S9 a1,a5**). In both wheat and mungbean, the intense ThT fluorescence and green-to-red  
583 birefringence characteristic of amyloids are apparent. To confirm the tissue origin of the  
584 protoplasts, the dissected aleurone cells and for staining control, leaf protoplasts with ThT  
585 staining are shown. (**Figure S9 f1-f4**)

586 Now, to confirm the role of the signalling molecules on the amyloid content of the protoplasts,  
587 these were treated with GA, ABA and an equimolar mixture of GA and ABA. ThT staining was  
588 performed and imaged immediately and after 2 hours. Wheat aleurone (**Figure 5 a1-a4**) and  
589 mungbean cotyledon (**Figure 5 c1-c4**) protoplasts treated with incubation buffer, GA, ABA, GA  
590 and ABA respectively at 0 hour show ThT signatures in the SSPB. The wheat (**Figure 5 b1-b4**)  
591 and mungbean (**Figure 5 d1-d4**) protoplasts after treatment for 2 hours, were again visualized  
592 for changes in ThT signature. The GA-treated protoplasts show a decrease in ThT fluorescence  
593 (**Figure 5 b2, d2, i and j**) for both wheat and mungbean, suggesting GA-regulated decrease in  
594 amyloid content. The ABA treated protoplasts show a similar intensity (**Figure 5 b3, d3, i and j**)  
595 as compared to control, whereas treatment with the mixture decreases the intensity in wheat but  
596 not in mungbean, reflecting on the possible differences in the amyloid structures of these two  
597 seeds (**Figure 5 b4, d4, i and j**).



598 After establishing the role of the plant hormones on amyloid degradation, the effect of proteases  
599 on these structures was investigated. At first, the seed endopeptidase fraction was isolated and  
600 purified. For this purpose, the mungbean and wheat seed (**Figure S8 a1-a2**) total protein isolates  
601 were analysed by size-exclusion chromatography and the fractions collected were checked for  
602 protein estimation. The protein-containing fractions were checked for enzymatic activity on  
603 casein as a substrate. Purified papain, was used as the control since papain-like proteases are  
604 upregulated in the seeds during germination.(Liu *et al.*, 2018) The representative enzymatic  
605 activity of the fractions from the 48h imbibed seeds and papain are shown in **Figure S8 a3-a4**.  
606 The isolated fractions were then checked for their time-dependent activity on casein and at each  
607 time-point, the amount of amino acids released due to digestion was assayed by ninhydrin, using  
608 casein as a substrate. The activity of the endopeptidases isolated from mungbean and wheat  
609 (**Figure S8 a5-a6**) after 48 hours of imbibition was found to be optimum.

610 The isolated protoplasts were next treated with papain (control) and endopeptidase fraction with  
611 or without PMSF. The wheat (**Figure 5 e1, f1**) and mungbean (**Figure 5 g1, h1**) protoplasts  
612 incubated with either papain, or endopeptidase fraction, lose their amyloid signature significantly  
613 over a period of 2 hours (**Figure 5 e2, f2, g2 and h2**). When treated with both papain and PMSF,  
614 (**Figure 5 e3, f3, g3 and h3**) or endopeptidase and PMSF (**Figure 5 e4, f4, g4 and h4**), the  
615 signature was retained, showing that PMSF inhibits the proteases. When the protoplasts were  
616 incubated with GA and PMSF, interestingly the signature is still retained, while GA alone leads  
617 to loss of amyloid signatures. This confirms that GA-induced upregulation of endoproteases is  
618 countered by the presence of PMSF (**Figure 5 e5, f5, g5 and h5**). Lastly, when the protoplasts  
619 were incubated with ABA and endopeptidase, (**Figure 5 e6, f6, g6 and h6**) the signatures lose,  
620 indicating that although ABA might be counteracting the effect of endogenous GA inside the  
621 protoplast, it cannot counter the effect of exogenous endopeptidase. The quantification is further  
622 confirmed by ImageJ (**Figure 5 k-l**). A similar pattern is observed in the CR-stained protoplasts  
623 (**Figure S9**). DLS analysis of the SSPB incubated with papain, and the endopeptidase fraction  
624 further exhibits the degradation of the SSPB, as evident from the decrease in the hydrodynamic  
625 diameter, while the presence of PMSF leads to maintenance of SSPB size (**Figure 5 m-n**).

626 Summarizing these results, the *in-situ* and *ex-vivo* results indicate that a systematic degradation  
 627 of the amyloid-containing SSPB is controlled by hormones and their downstream effectors, for  
 628 facilitating germination.

629

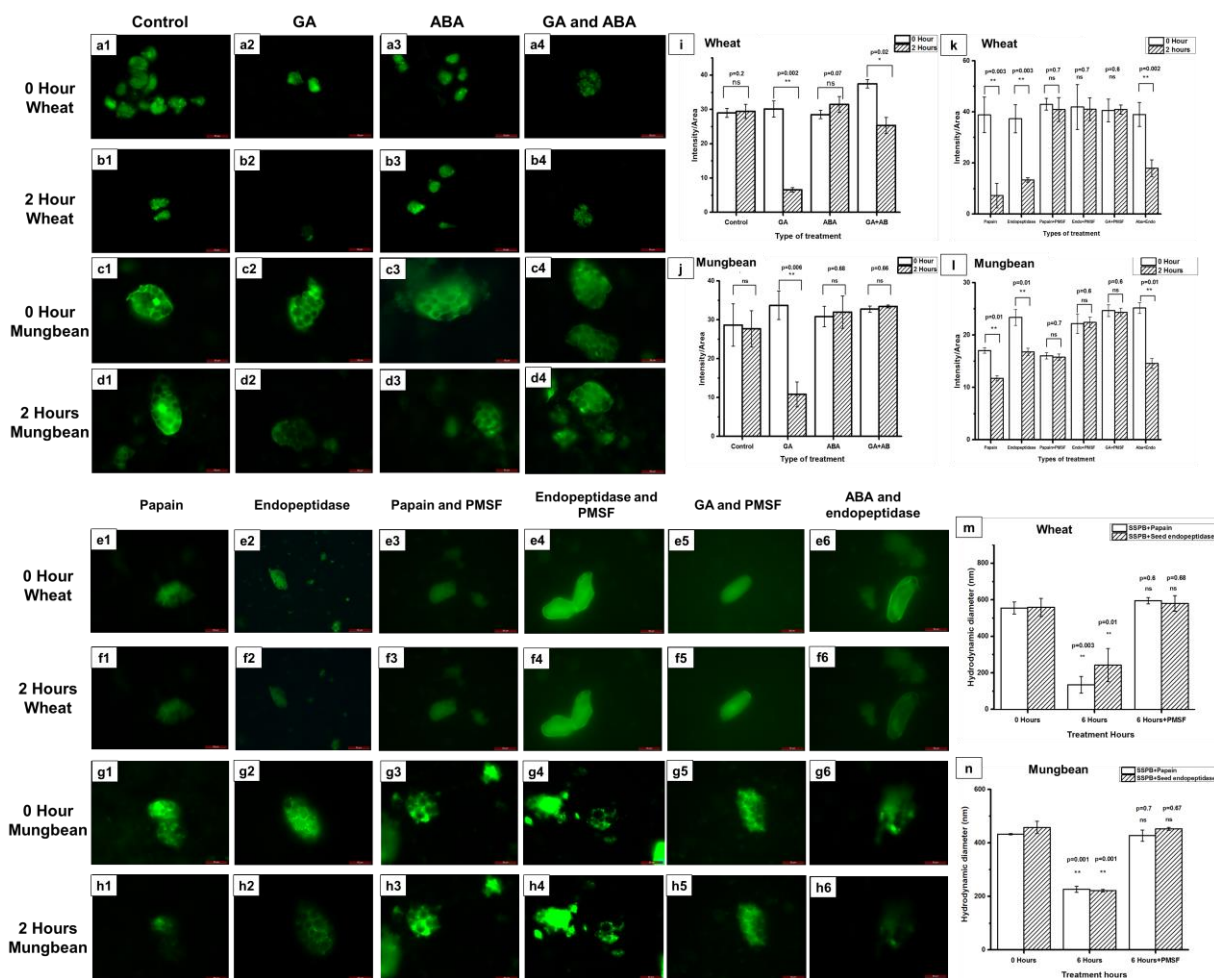

630

631 **Figure 5: Effect of plant hormones and proteases on amyloid aggregates.** Wheat aleurone  
 632 protoplasts treated with buffer, gibberellin (GA), abscissic acid (ABA), GA and ABA at 0 hour (a1-a4). The  
 633 protoplasts were treated for 2 hours with the same treatment (b1-b4). 0-hour mungbean cotyledon  
 634 protoplasts treated with buffer, GA, ABA, GA and ABA, (c1-c4) whereas protoplasts after similar treatment  
 635 of 2 hours are shown in (d1-d4). GA treatment decreases the amyloid signal whereas ABA treatment  
 636 leads to retention of fluorescence. A combined treatment of these hormones, show decrease in  
 637 fluorescence in the wheat but not in mungbean protoplasts. The quantification of the ThT fluorescence is  
 638 analysed by ImageJ and represented as (i) for wheat and (j) for mungbean. Wheat (e1-f6) and mungbean  
 639 (g1-h6) protoplasts were treated with papain (e1,f1,g1,h1) endopeptidase (e2,f2,g2,h2), papain and  
 640 PMSF (e3,f3,g3,h3), endopeptidase and PMSF (e4,f4,g4,h4), GA and PMSF (e5,f5,g5,h5), ABA and  
 641 endopeptidase (e6,f6,g6,h6) at 0 hours and after 2 hours. The signatures were quantified and plotted in  
 642 (k) and (l) for wheat and mungbean respectively. Treatment with the proteases decrease the amyloid  
 643 signatures, whereas simultaneous treatment with PMSF does not exhibit any signal decrease. GA and  
 644 PMSF treatment shows a similar amyloid signal after 2 hours, while ABA and endopeptidase treatment

645 decreases it. DLS analysis of the SSPB with the proteases with or without PMSF are represented in (m-  
646 n). The treatment with proteases decreases the size of the SSPB, while presence of PMSF prevents the  
647 decrease in size. (Gamma value for each image is 1.3-1.6, Graphs are represented as mean with error  
648 bars as standard error of mean, Scale bars for microscopy corresponds to 50  $\mu$ M)

649

650

## 651 **Discussion:**

652 The proteinaceous plant SSPB is known for its role in germination. However, the complex  
653 internal arrangement of proteins is not elucidated till now. In morphological aspects, SSPB are  
654 similar to other organisms' amyloid-containing protein bodies. Also, previously, some plant  
655 proteins were shown to form amyloid fibrils *in-vitro* under non-native conditions. Based on  
656 these, we hypothesized that the monocot and dicot SSPB might contain similar structures *in-vivo*  
657 for modulating seed physiological functions. Importantly, experimental validation using multiple  
658 amyloid-specific dyes is imperative to assign amyloid or amyloid-like properties to proteins and  
659 to remove the prevailing perplexity of the presence of proteinaceous amyloids and glucan  
660 structures.(Matiiv *et al.*, 2020) To establish this, we employed a multispectral strategy and have  
661 overcome these issues using several amyloid-specific probes. Fascinatingly, whereas ThT and  
662 Proteostat<sup>®</sup> bound to the entire SSPB-containing regions of aleurone and cotyledon cells, the  
663 birefringence signals of amyloid due to CR staining appeared in only some areas. The  
664 amyloidogenic proteins were confirmed by LMD-MS/MS and the amyloidogenicity is allotted  
665 primarily to the globulins.

666 To further establish the hypothesis and to gain an insight into the amyloidogenic properties of  
667 these structures, we isolated the SSPB from the aleurone and cotyledon cells and utilized these  
668 for physicochemical studies including DLS, SEM, TEM, HRTEM, FTIR, SDS-PAGE and XRD.  
669 The SSPB and the dialyzed globulin fibrils exhibit ThT and CR signatures, prominent amyloid  
670 signatures in IR spectra and fibrillar structures in HRTEM. These also exhibit detergent  
671 resistance and amyloid-specific reflections in XRD. On the other hand, the isolated protein  
672 fractions from the SSPB in their soluble state (globulin and albumin), are devoid of such  
673 signatures, and suggests that they assemble in the SSPB and exhibit amyloid composite structure.

674 Next, to assess the functional roles of the amyloid structures in seed, their signatures and content  
675 was followed during the germination and seedling growth by *in-situ* techniques. The results

676 suggest that the ThT-stained amyloid-like structures degrade faster compared to the CR-stained  
677 amyloids, due to the differential stability of these two assemblies. The SSPB isolated from  
678 germinated seeds further show a decrease in the propensity of amyloid signature by IR and  
679 establishes the degradation of the amyloids in germination. The amyloidogenic protein content of  
680 the CR positive amyloid areas after 72 hours in mungbean and wheat further shows that some  
681 storage proteins degrade slower compared to others and might be present in more stable  
682 structural arrangement.

683 Since seed germination is dependent on plant hormones and proteases; we next carried out  
684 functional assay of the amyloids by employing exogenous hormones, proteases and their  
685 inhibitors. These results were further validated using protoplasts, which serve as the active  
686 metabolic state of the seed cotyledon and aleurone cells. The protoplasts were utilized for  
687 investigating the molecular players responsible for amyloid degradation during germination. The  
688 results indicate that on seed imbibition, GA would lead to an enhanced expression of proteases  
689 which can subsequently degrade the amyloid structures present in the SSPB. The effect can be  
690 countered with the help of either ABA, a known antagonistic molecule of GA, or by using  
691 protease inhibitors such as PMSF. The inhibition of amyloid degradation was found to reduce the  
692 germination index, further confirming that amyloid degradation plays a crucial role for  
693 controlling seed germination in the wheat and mungbean seeds.

694 Since amyloid formation follows pathways of nucleation and elongation, the same phenomenon  
695 may explain the biogenesis of the SSPB, as aggregated structures by self-seeding and cross-  
696 seeding of other protein components. The presence of these structures might facilitate protection  
697 of seeds from various environmental stresses. The current study would open up new research  
698 questions to study the SSPB biogenesis and might illuminate the enigmatic issue of the role of  
699 functional amyloids in evolution across species.

700 **Acknowledgements:** We are thankful to Prof. Pradip Sinha and Prof. Amitabha Bandyopadhyay  
701 for letting us use their confocal imaging facility and ultramicrotome facility. We also thank Mr.  
702 Upendra Singh Yadav and Mr. Saurabh Singh Parihar for helping with these facilities. We are  
703 thankful to Dr. Geetashree Mukherjee and Mr. Suman Sarkar for the laser capture  
704 microdissection facility and Dr. Saravanan Matheshwaran for size exclusion chromatography.  
705 We are thankful to Advanced Imaging Centre IIT Kanpur and Mr. Jai Singh for TEM and

706 HRTEM analysis. We are thankful to Dr. Shraddha Singh and BSBE department for SEM  
707 analysis and to IITK-ACMS X-ray diffraction facility for powder diffraction data. N.S and T.Z.  
708 acknowledge University Grants Commission for Senior Research Fellowship.

709 **Data availability:** The data that support the findings of this study are available from the  
710 corresponding author upon reasonable request.

711 **Author contributions:** The original concept was conceived by A.K.T. two decades ago. A.K.T  
712 supervised the experiments; A.K.T. and N.S designed the experiments. N.S. carried out most of  
713 the experiments conducted in the current manuscript. A.K.T and N.S. analyzed the data; A.Y.G  
714 performed the initial sectioning and staining experiments; N.S. and T.Z. performed the  
715 sectioning, staining and protoplast isolation experiments. B.R. independently validated staining  
716 data and performed SDS-PAGE. A.B., S.B. and A.C. helped in proteomics data acquisition and  
717 analysis. A.K.T and N.S. wrote the manuscript.

718

## 719 **References:**

- 720 **Ahmad F, Zhou Y, Ling Z, Xiang Q, Zhou X. 2016.** Systematic Elucidation of Interactive Unfolding and  
721 Corona Formation of Bovine serum albumin with Cobalt Ferrite Nanoparticles. *RSC Advances* **6**.  
722 **Antonets KS, Belousov MV, Sulatskaya AI, Belousova ME, Kosolapova AO, Sulatsky MI, Andreeva EA,**  
723 **Zykin PA, Malovichko YV, Shtark OY, et al. 2020.** Accumulation of storage proteins in plant  
724 seeds is mediated by amyloid formation. *PLOS Biology* **18**(7): e3000564.  
725 **Antonets KS, Nizhnikov AA. 2017.** Predicting Amyloidogenic Proteins in the Proteomes of Plants. *Int J*  
726 *Mol Sci* **18**(10).  
727 **Belli M, Ramazzotti M, Chiti F. 2011.** Prediction of amyloid aggregation in vivo. *EMBO reports* **12**(7):  
728 657-663.  
729 **Benson MD, Buxbaum JN, Eisenberg DS, Merlini G, Saraiva MJM, Sekijima Y, Sipe JD, Westermarck P.**  
730 **2020.** Amyloid nomenclature 2020: update and recommendations by the International Society  
731 of Amyloidosis (ISA) nomenclature committee. *Amyloid* **27**(4): 217-222.  
732 **Bethke PC, Hillmer S, Jones RL. 1996.** Isolation of Intact Protein Storage Vacuoles from Barley Aleurone:  
733 Identification of Aspartic and Cysteine Proteases. *Plant Physiology* **110**(2): 521-529.  
734 **Biancalana M, Koide S. 2010.** Molecular mechanism of Thioflavin-T binding to amyloid fibrils. *Biochim*  
735 *Biophys Acta* **1804**(7): 1405-1412.  
736 **Bleem A, Daggett V. 2017.** Structural and functional diversity among amyloid proteins: Agents of  
737 disease, building blocks of biology, and implications for molecular engineering. *Biotechnology*  
738 *and Bioengineering* **114**(1): 7-20.  
739 **Boke E, Ruer M, Wühr M, Coughlin M, Lemaitre R, Gygi SP, Alberti S, Drechsel D, Hyman AA, Mitchison**  
740 **TJ. 2016.** Amyloid-like Self-Assembly of a Cellular Compartment. *Cell* **166**(3): 637-650.  
741 **Burton RA, Fincher GB. 2014.** Evolution and development of cell walls in cereal grains. *Front Plant Sci* **5**:  
742 456.

743 **Chakraborty P, Bera S, Mickel P, Paul A, Shimon LJW, Arnon ZA, Segal D, Král P, Gazit E. 2022.**  
744 Inhibitor-Mediated Structural Transition in a Minimal Amyloid Model. *Angewandte Chemie*  
745 *International Edition* **61**(3): e202113845.

746 **Craig S, Millerd A. 1981.** Pea seed storage proteins — Immunocytochemical localization with protein a-  
747 gold by electron microscopy. *Protoplasma* **105**(3): 333-339.

748 **Derbyshire E, Wright DJ, Boulter D. 1976.** Legumin and vicilin, storage proteins of legume seeds.  
749 *Phytochemistry* **15**(1): 3-24.

750 **Eisenberg D. 2003.** The discovery of the alpha-helix and beta-sheet, the principal structural features of  
751 proteins. *Proc Natl Acad Sci U S A* **100**(20): 11207-11210.

752 **Ghosh S, Khanra D, Krishna V, Thakur AK. 2021.** Wild type transthyretin cardiac amyloidosis in a young  
753 individual: A case report. *Medicine* **100**(17): e25462-e25462.

754 **Görg A, Drews O, Weiss W. 2006.** Extraction and solubilization of total protein from plant seeds. *CSH*  
755 *Protoc* **2006**(1).

756 **Guo WJ, Ho TH. 2008.** An abscisic acid-induced protein, HVA22, inhibits gibberellin-mediated  
757 programmed cell death in cereal aleurone cells. *Plant Physiol* **147**(4): 1710-1722.

758 **Han C, Yin X, He D, Yang P. 2013.** Analysis of Proteome Profile in Germinating Soybean Seed, and Its  
759 Comparison with Rice Showing the Styles of Reserves Mobilization in Different Crops. *PLOS ONE*  
760 **8**(2): e56947.

761 **Herrera-Ubaldo H, de Folter S. 2018.** Exploring Cell Wall Composition and Modifications During the  
762 Development of the Gynoecium Medial Domain in Arabidopsis. *Frontiers in Plant Science* **9**(454).

763 **Heyn TR, Mayer J, Neumann HR, Selhuber-Unkel C, Kwade A, Schwarz K, Keppler JK. 2020.** The  
764 threshold of amyloid aggregation of beta-lactoglobulin: Relevant factor combinations. *Journal of*  
765 *Food Engineering* **283**: 110005.

766 **Isaienkov SV. 2014.** [Plant vacuoles: physiological roles and mechanisms of vacuolar sorting and  
767 vesicular trafficking]. *Tsitol Genet* **48**(2): 71-82.

768 **Jääskeläinen A-S, Holopainen-Mantila U, Tamminen T, Vuorinen T. 2013.** Endosperm and aleurone cell  
769 structure in barley and wheat as studied by optical and Raman microscopy. *Journal of Cereal*  
770 *Science* **57**(3): 543-550.

771 **Jacobsen JV, Zwar JA, Chandler PM. 1985.** Gibberellic-acid-responsive protoplasts from mature  
772 aleurone of Himalaya barley. *Planta* **163**(3): 430-438.

773 **Kesari V, Rangan L. 2011.** Coordinated changes in storage proteins during development and germination  
774 of elite seeds of Pongamia pinnata, a versatile biodiesel legume. *AoB PLANTS* **2011**: plr026-  
775 plr026.

776 **Kooiman P. 1960.** A method for the determination of amyloid in plant seeds. *Recueil des Travaux*  
777 *Chimiques des Pays-Bas* **79**(7): 675-678.

778 **Koziol AG, Loit E, McNulty M, MacFarlane AJ, Scott FW, Altosaar I. 2012.** Seed storage proteins of the  
779 globulin family are cleaved post-translationally in wheat embryos. *BMC Research Notes* **5**(1):  
780 385.

781 **Kumar V, Sinha N, Thakur AK. 2021.** Necessity of regulatory guidelines for the development of amyloid  
782 based biomaterials. *Biomaterials Science* **9**(12): 4410-4422.

783 **Kusumah J, Real Hernandez LM, Gonzalez de Mejia E. 2020.** Antioxidant Potential of Mung Bean (*Vigna*  
784 *radiata*) Albumin Peptides Produced by Enzymatic Hydrolysis Analyzed by Biochemical and In  
785 Silico Methods. *Foods* **9**(9).

786 **Laor D, Sade D, Shaham-Niv S, Zaguri D, Gartner M, Basavalingappa V, Raveh A, Pichinuk E, Engel H,**  
787 **Iwasaki K, et al. 2019.** Fibril formation and therapeutic targeting of amyloid-like structures in a  
788 yeast model of adenine accumulation. *Nature Communications* **10**(1): 62.

789 **Liu H, Hu M, Wang Q, Cheng L, Zhang Z. 2018.** Role of Papain-Like Cysteine Proteases in Plant  
790 Development. *Front Plant Sci* **9**: 1717.

791 **Madine J, Jack E, Stockley PG, Radford SE, Serpell LC, Middleton DA. 2008.** Structural Insights into the  
792 Polymorphism of Amyloid-Like Fibrils Formed by Region 20–29 of Amylin Revealed by Solid-State  
793 NMR and X-ray Fiber Diffraction. *Journal of the American Chemical Society* **130**(45): 14990-  
794 15001.

795 **Matiiv AB, Trubitsina NP, Matveenko AG, Barbitoff YA, Zhouravleva GA, Bondarev SA. 2020.** Amyloid  
796 and Amyloid-Like Aggregates: Diversity and the Term Crisis. *Biochemistry (Moscow)* **85**(9): 1011-  
797 1034.

798 **Moreno FJ, Clemente A. 2008.** 2S Albumin Storage Proteins: What Makes them Food Allergens? *The*  
799 *open biochemistry journal* **2**: 16-28.

800 **Murphy CL, Eulitz M, Hrcic R, Sletten K, Westermark P, Williams T, Macy SD, Wooliver C, Wall J,**  
801 **Weiss DT, et al. 2001.** Chemical typing of amyloid protein contained in formalin-fixed paraffin-  
802 embedded biopsy specimens. *Am J Clin Pathol* **116**(1): 135-142.

803 **Narayanaswamy R, Levy M, Tsechansky M, Stovall GM, O'Connell JD, Mirrielees J, Ellington AD,**  
804 **Marcotte EM. 2009.** Widespread reorganization of metabolic enzymes into reversible  
805 assemblies upon nutrient starvation. *Proceedings of the National Academy of Sciences* **106**(25):  
806 10147-10152.

807 **Navarro S, Ventura S. 2014.** Fluorescent dye ProteoStat to detect and discriminate intracellular amyloid-  
808 like aggregates in Escherichia coli. *Biotechnol J* **9**(10): 1259-1266.

809 **Nijholt DAT, Stingl C, Luider TM 2015.** Laser Capture Microdissection of Fluorescently Labeled Amyloid  
810 Plaques from Alzheimer's Disease Brain Tissue for Mass Spectrometric Analysis. In: Vlahou A,  
811 Makridakis M eds. *Clinical Proteomics: Methods and Protocols*. New York, NY: Springer New  
812 York, 165-173.

813 **Oshinbolu S, Shah R, Finka G, Molloy M, Uden M, Bracewell DG. 2018.** Evaluation of fluorescent dyes to  
814 measure protein aggregation within mammalian cell culture supernatants. *Journal of chemical*  
815 *technology and biotechnology (Oxford, Oxfordshire : 1986)* **93**(3): 909-917.

816 **Otegui MS, Herder R, Schulze J, Jung R, Staehelin LA. 2006.** The proteolytic processing of seed storage  
817 proteins in Arabidopsis embryo cells starts in the multivesicular bodies. *The Plant Cell* **18**(10):  
818 2567-2581.

819 **Peters LZ, Karmon O, David-Kadoch G, Hazan R, Yu T, Glickman MH, Ben-Aroya S. 2015.** The Protein  
820 Quality Control Machinery Regulates Its Misassembled Proteasome Subunits. *PLOS Genetics*  
821 **11**(4): e1005178.

822 **Quintieri L, Monteverde A, Caputo L. 2012.** Changes in prolamin and high resistant starch composition  
823 during the production process of Boza, a traditional cereal-based beverage. *European Food*  
824 *Research and Technology* **235**.

825 **Reyes FC, Chung T, Holding D, Jung R, Vierstra R, Otegui MS. 2011.** Delivery of Prolamins to the Protein  
826 Storage Vacuole in Maize Aleurone Cells. *The Plant Cell* **23**(2): 769-784.

827 **Rohrschneider M, Bhagwat S, Krampe R, Michler V, Breikreutz J, Hochhaus G. 2015.** Evaluation of the  
828 Transwell System for Characterization of Dissolution Behavior of Inhalation Drugs: Effects of  
829 Membrane and Surfactant. *Molecular Pharmaceutics* **12**(8): 2618-2624.

830 **Santos J, Ventura S. 2021.** Functional Amyloids Germinate in Plants. *Trends in Plant Science* **26**(1): 7-10.

831 **Sarroukh R, Goormaghtigh E, Ruyschaert J-M, Raussens V. 2013.** ATR-FTIR: A "rejuvenated" tool to  
832 investigate amyloid proteins. *Biochimica et Biophysica Acta (BBA) - Biomembranes* **1828**(10):  
833 2328-2338.

834 **Schmidt SR. 2013.** Protein Bodies in Nature and Biotechnology. *Molecular Biotechnology* **54**(2): 257-268.

835 **Shewry PR. 2003.** Tuber storage proteins. *Annals of Botany* **91**(7): 755-769.

836 **Shewry PR, Halford NG. 2002.** Cereal seed storage proteins: structures, properties and role in grain  
837 utilization. *Journal of Experimental Botany* **53**(370): 947-958.

838 **Shewry PR, Napier JA, Tatham AS. 1995.** Seed storage proteins: structures and biosynthesis. *The Plant*  
839 *Cell* **7**(7): 945-956.

840 **Shu K, Zhou W, Chen F, Luo X, Yang W. 2018.** Abscisic Acid and Gibberellins Antagonistically Mediate  
841 Plant Development and Abiotic Stress Responses. *Frontiers in Plant Science* **9**.

842 **Silveira P, De Jesus L, Souza L, Bispo E, Soares S. 2017.** Protease prospecion and determination of its  
843 isoenzymes activity in cocoa cultivars (*Theobroma cacao* L.). *Food Science and Technology*  
844 (*Campinas*) **37**.

845 **Surguchov A, Emamzadeh FN, Surguchev AA. 2019.** Amyloidosis and Longevity: A Lesson from Plants.  
846 *Biology (Basel)* **8**(2).

847 **Taiz L, Jones RL. 1971.** The isolation of barley-aleurone protoplasts. *Planta* **101**(2): 95-100.

848 **Waeysens J, Mathurin J, Deniset-Besseau A, Arluison V, Bousset L, Rezaei H, Raussens V, Dazzi A. 2021.**  
849 Probing amyloid fibril secondary structures by infrared nanospectroscopy: experimental and  
850 theoretical considerations. *Analyst* **146**(1): 132-145.

851 **Wood JA, Knights EJ, Choct M. 2011.** Morphology of Chickpea Seeds (*Cicer arietinum* L.): Comparison of  
852 desi and kabuli Types. *International Journal of Plant Sciences* **172**(5): 632-643.

853 **Yi-Shen Z, Shuai S, FitzGerald R. 2018.** Mung bean proteins and peptides: nutritional, functional and  
854 bioactive properties. *Food Nutr Res* **62**.

855

856
